# Supplementary material
Source: Springer Nature journal article supplement (https://www.springermedizin.de/resource/supplementary/12889_2008_1491_MOESM15_ESM.pdf/9504408)

### Overweight

### Obese

0.1 0.5 1 2 4 16

0.1 0.5 1 2 4 16 32

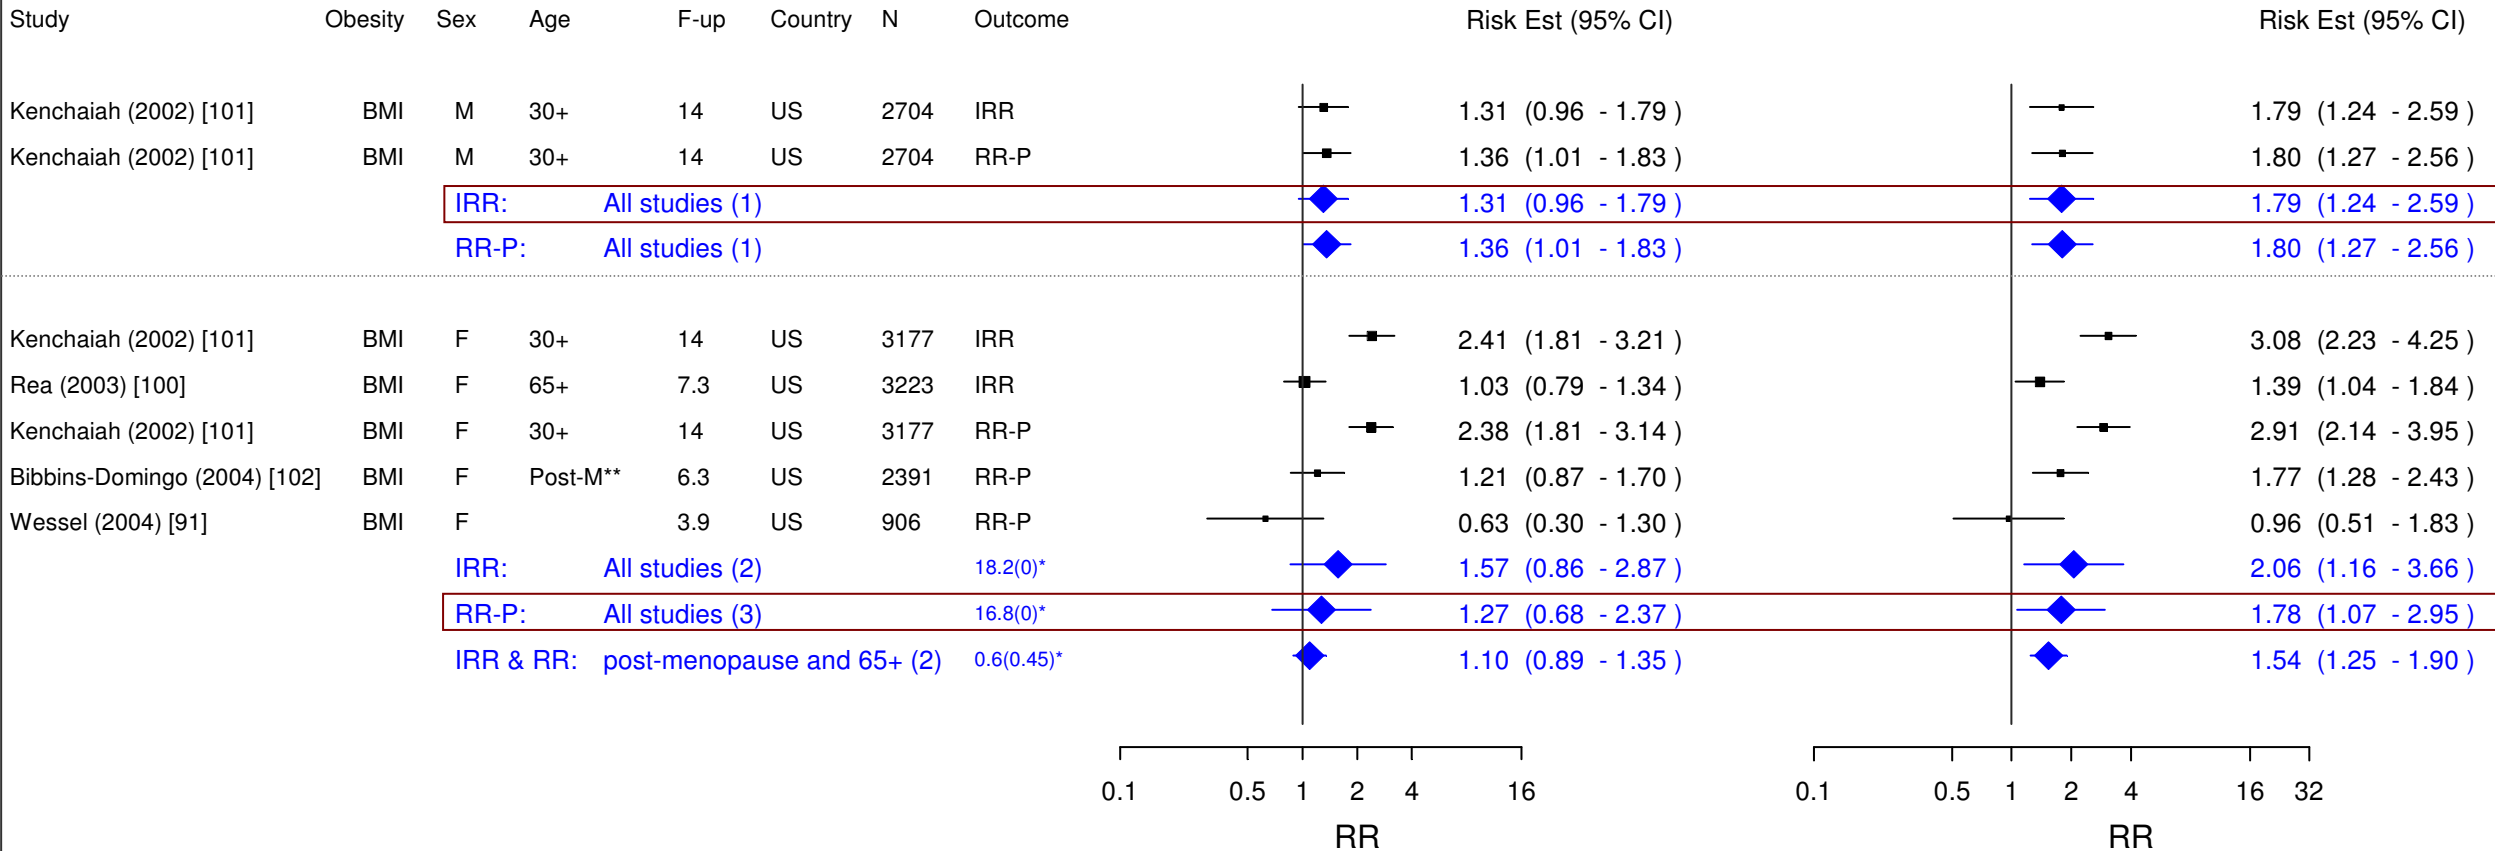

Supplement: MOESM15 [file 9504408]
